# Supplementary material for: Phenylboronate-salicylate ester cross-linked self-healing hydrogel composed of modified hyaluronan at physiological pH
Source: Royal Society of Chemistry journal article supplement (doi:10.1039/d3sm01417g), 2024-01-01
Supplement: d3sm01417g3.pdf [file d3sm01417g3.pdf]

Soft Matter

Supporting Information

Phenylboronate-salicylate ester cross-linked self-healing hydrogel composed of modified hyaluronan at physiological pH

Ryotaro Miki,\* Tsutomu Yamaki, Masaki Uchida, Hideshi Natsume

*Faculty of Pharmacy and Pharmaceutical Sciences, Josai University, 1-1 Keyakidai, Sakado, Saitama 350-0295, Japan*

*\*To whom correspondence should be addressed: Faculty of Pharmacy and Pharmaceutical Sciences, Josai University, 1-1 Keyakidai, Sakado, Saitama 350-0295, Japan*

*E-mail: [rmiki@josai.ac.jp](mailto:rmiki@josai.ac.jp)*

*Tel: +81-49-271-7052*

*Fax: +81-49-271-7052*

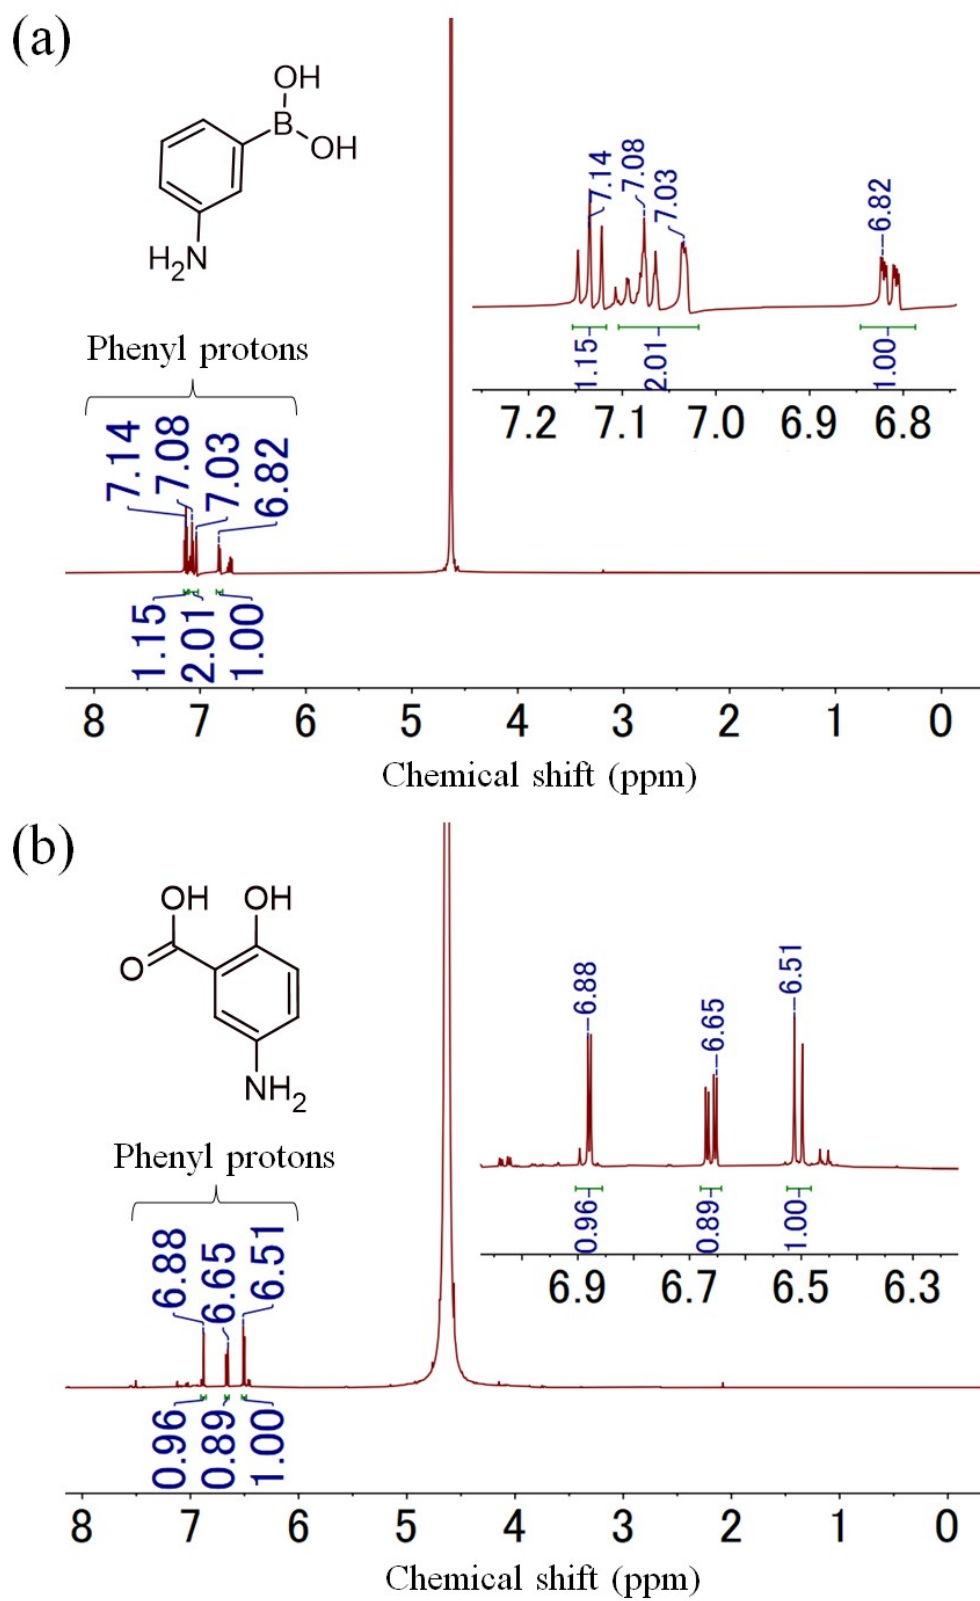

**Fig. S1**  $^1\text{H}$  NMR spectra of (a) 3APBA, and (b) Asal.
